# Supplementary material for: Severe Natural Outbreak of Cryptocaryon irritans in Gilthead Seabream Produces Leukocyte Mobilization and Innate Immunity at the Gill Tissue
Source: MDPI journal article supplement (doi:10.3390/ijms23020937), 2022-01-15
Supplement: s1 [file s1]

**Supplementary Table S1.** Information about the studied genes and primer sequences used in this study.

| Protein name                                 | Gene name    | Accession number | Sequence (5'→3')                                       |
|----------------------------------------------|--------------|------------------|--------------------------------------------------------|
| Elongation factor 1 alpha                    | <i>ef1a</i>  | AF184170         | F: CTTCAACGCTCAGGTCATCAT<br>R: GCACAGCGAAACGACCAAGGGGA |
| Myeloperoxidase                              | <i>mpo</i>   | FM148574         | F: TTGGTCCAGACATCCTCG<br>R: ATGGGCAAAGCGGTAG           |
| Tryptase-like                                | <i>tryp</i>  | NC_044209        | F: AAATGTGAAACTGCCCAGCG<br>R: GATCCGGCAGTGGAGCATTA     |
| Colony stimulation-factor 1 receptor         | <i>csflr</i> | AM050293         | F: ACGTCTGGTCCTATGGCATC<br>R: AGTCTGGTTGGGACATCTGG     |
| NADPH oxidase subunit p40phox                | <i>ncf4</i>  | AM749961         | F: GCGGAGTTGAACCTGAAGAG<br>R: TCACCTTCTGTGTCGCTGTC     |
| Major histocompatibility complex-II alpha    | <i>mhc2a</i> | DQ019401         | F: CTGGACCAAGAACGGAAAGA<br>R: CATCCCAGATCCTGGTCAGT     |
| T-cell receptor beta chain                   | <i>tcrb</i>  | AM261210         | F: AAGTGCATTGCCAGCTTCTT<br>R: TTGGCGGTCTGACTTCTCTT     |
| T-cell antigen cluster of differentiation 4  | <i>cd4</i>   | AM849812         | F: TGTCACAGTCATCGTGCTCC<br>R: GCCTGGGGTGTCTCATCTTC     |
| T-cell antigen cluster of differentiation 8a | <i>cd8a</i>  | AJ846849         | F: CTGTCCTCCGCTCATACTGG<br>R: TTGTAATGATGGGGGCATCT     |
| Heavy chain of immunoglobulin M              | <i>ighm</i>  | JQ811851         | F: CAACATGCCCAATTGATGAG<br>R: GGCACGACACTCTAGCTTCC     |
| Heavy chain of immunoglobulin T              | <i>ight</i>  | FM145138         | F: TGGCAAATTGATGGACAAAA<br>R: CCATCTCCCTTGTGGACAGT     |
| Interleukin-1 beta                           | <i>il1b</i>  | AJ277166         | F: GGGCTGAACAACAGCACTCTC<br>R: TTAACACTCTCCACCCTCCA    |
| Interleukin-6                                | <i>il6</i>   | AM749958         | F: AGGCAGGAGTTTGAAGCTGA<br>R: ATGCTGAAGTTGGTGGGAAGG    |
| Interleukin-8                                | <i>il8</i>   | AM765841         | F: GCCACTCTGAAGAGGACAGG                                |

|                                                   |               |               |                                                                               |
|---------------------------------------------------|---------------|---------------|-------------------------------------------------------------------------------|
| NK-lysin                                          | <i>nkl</i>    | MN240490      | R: TTTGGTTGTCTTTGGTCGAA<br>F: CGCACCTCGGAGAACTGATT<br>R: TCCACGTCGCTTCGGTAAAA |
| β-defensin                                        | <i>bdef</i>   | FM158209      | F: CCCCAGTCTGAGTGGAGTGT<br>R: AATGAGACACGCAGCACAAG                            |
| Lysozyme                                          | <i>lyz</i>    | AM749959      | F: CCAGGGCTGGAAATCAACTA<br>R: CCAACATCAACACCTGCAAC                            |
| Hepcidin                                          | <i>hamp</i>   | CB184616      | F: GCCATCGTGCTCACCTTTAT<br>R: CTGTTGCCATACCCCATCTT                            |
| Non-specific<br>cytotoxic cell<br>receptor-type 1 | <i>nccrpl</i> | AY651258      | F: ACTTCCTGCACCGACTCAAG<br>R: TAGGAGCTGGTTTTGGTTGG                            |
| Fas ligand                                        | <i>fasl</i>   | ENSSAUT000100 | F: GCCACTTTGCCCGAACAATT<br>R: GGTGGGGCAGTAAATCACCA                            |
| Granzyme A                                        | <i>gzma</i>   | MK568066      | F: TCCCTGCTATGATGCAACTG<br>R: ATTCACCGTCTTGGTTTGC                             |
| Granzyme B                                        | <i>gzmb</i>   | AM957224      | F: GAAACAAAGGAACGGGTCAA<br>R: GAGCTGTCCATCTTTTGCTTG                           |
